# Supplementary material
Source: PubMed Central journal article supplement (PMC4146498)
Supplement: Supp_Fig1.pdf [file Supp_Fig1.pdf]

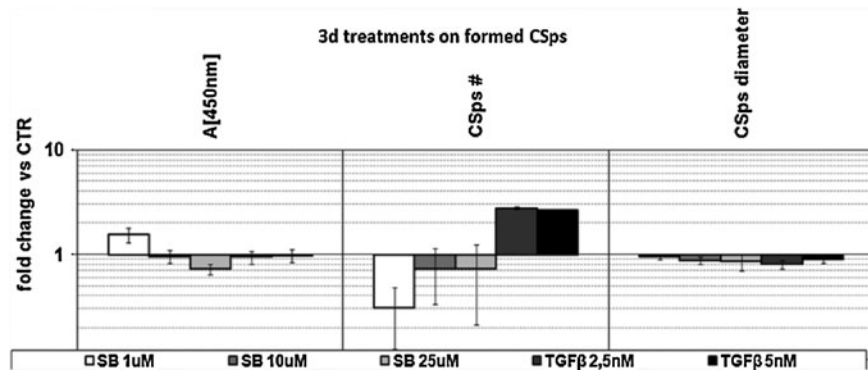

**SUPPLEMENTARY FIG. S1.** SB431542 and transforming growth factor  $\beta$  (TGF $\beta$ ) 3-day treatments on preformed CSps. Bars represent: the absorbance at 450 nm, indicative of the metabolic activity (WST8 assay), CSp diameter, and number of CSps at day 7 after 3 days of treatment of preformed CSps (4 days after EDCs plating). EDCs, explant-derived cells; CSp, cardiosphere; SB, SB431542; A[450 nm], absorbance at 450 nm; d, days; t, treatment.
