# Supplementary material
Source: PubMed Central journal article supplement (PMC4146498)
Supplement: Supp_Fig2.pdf [file Supp_Fig2.pdf]

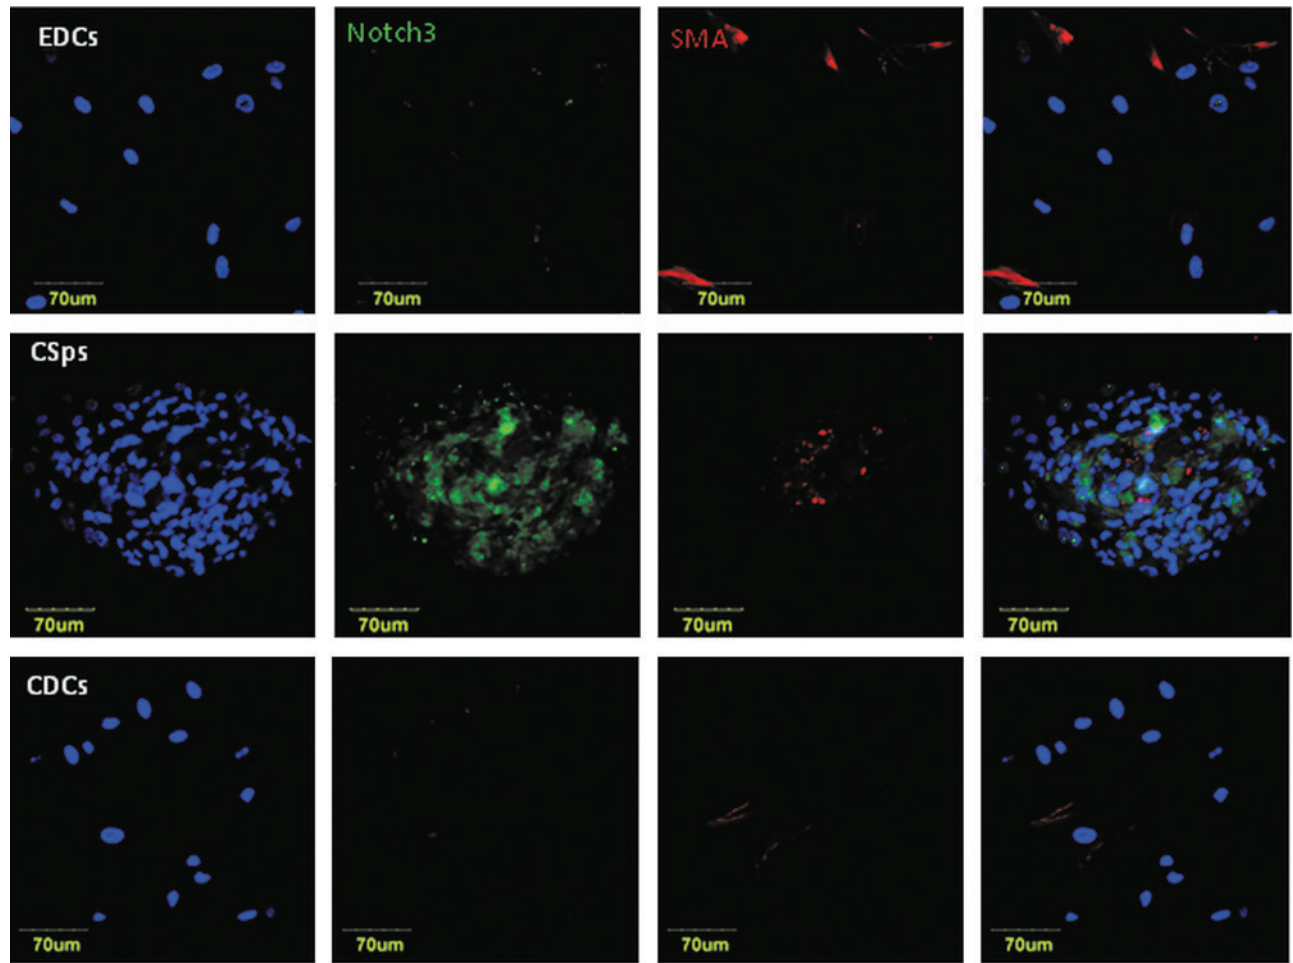

**SUPPLEMENTARY FIG. S2.** NOTCH3 expression is elevated in 3D structures. Immunofluorescence staining of EDCs, CSps, and CDCs for NOTCH3 (green), ACTA2 (SMA, red), and Hoechst (blue), showing that nearly all cells in the CSps are strongly positive for NOTCH3, compared with only a few positive cells in the monolayers. Confocal images were acquired with a 40 $\times$ oil immersion objective with consistent settings and from the same immunostaining experiment. For CSps, 1 representative slice has been selected out of a stack of 10–15 slices (1.5  $\mu$ m step). CDCs, cardiosphere-derived cells.
