# Supplementary material
Source: PubMed Central journal article supplement (PMC4146498)
Supplement: Supp_Fig3.pdf [file Supp_Fig3.pdf]

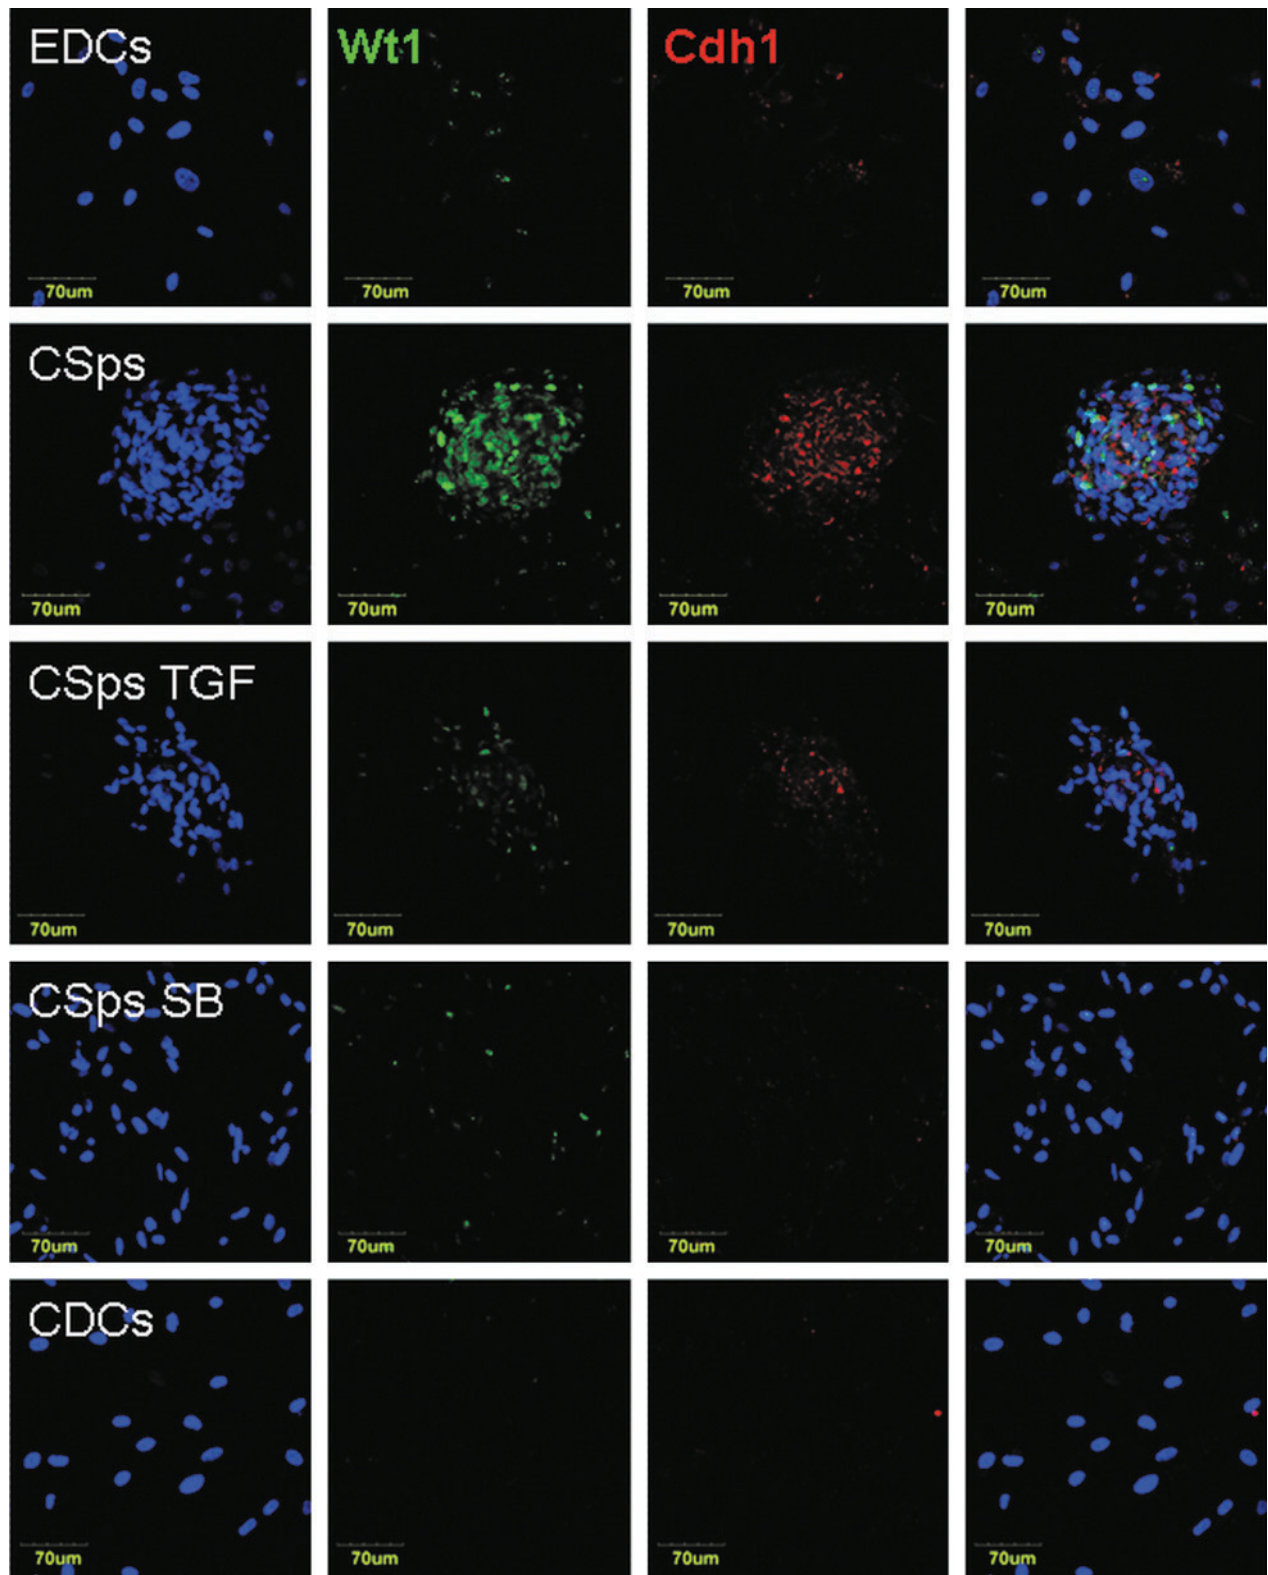

**SUPPLEMENTARY FIG. S3.** WT1 expression at different culture stages. Immunofluorescence stainings of EDCs, EDCs plated to form CSps in the presence of TGF $\beta$  (5 nM) or SB431542 (10  $\mu$ M), CSps, and CDCs for WT1 (green), CDH1 (red), and Hoechst (blue) show a brighter and wider signal that is related to WT1 in CSps, CSps obtained in the presence of TGF or SB, compared with CDCs and EDCs. Confocal images were acquired with a 40 $\times$  oil immersion objective with consistent settings and from the same immunostaining experiment. For CSps, 1 representative slice has been selected out of a stack of 10–15 slices (1.5  $\mu$ m step).
