# Supplementary material
Source: PubMed Central journal article supplement (PMC4146498)
Supplement: Supp_Table.pdf [file Supp_Table.pdf]

SUPPLEMENTARY TABLE S1. TAQMAN PROBES SELECTED FOR THE CUSTOM TAQMAN MICROFLUIDIC ARRAY CARDS

| Selected Probes for Taqman Array Microfluidic Cards (Applied Biosystems, Inc.) |               |               |                 |         |               |
|--------------------------------------------------------------------------------|---------------|---------------|-----------------|---------|---------------|
| EMT                                                                            | SNAI1         | Hs00195591_m1 | progenitors     | KIT     | Hs00174029_m1 |
|                                                                                | CDH2          | Hs00169953_m1 |                 | ISL1    | Hs00158126_m1 |
|                                                                                | TGFBR2        | Hs00234253_m1 |                 | SMARCD3 | Hs00162003_m1 |
|                                                                                | ACVR1         | Hs00153836_m1 |                 | MESP1   | Hs00251489_m1 |
|                                                                                | TGFBR1        | Hs00610318_m1 | vascular/EndMT  | WT1     | Hs01103751_m1 |
|                                                                                | FGFR1         | Hs00915142_m1 |                 | TEK     | Hs00176096_m1 |
|                                                                                | SNAI2         | Hs00161904_m1 |                 | BMP4    | Hs00370078_m1 |
|                                                                                | SMAD2         | Hs00183425_m1 |                 | CDH5    | Hs00174344_m1 |
| TWIST1                                                                         | Hs00361186_m1 | KDR           | Hs00911708_m1   |         |               |
| iPS                                                                            | MYC           | Hs00153408_m1 | cardiac/hypoxia | ACTA2   | Hs00909449_m1 |
|                                                                                | POU5F1        | Hs00742896_s1 |                 | HIF1A   | Hs00936368_m1 |
|                                                                                | KLF4          | Hs00358836_m1 |                 | NOTCH3  | Hs00166432_m1 |
|                                                                                | SOX2          | Hs01053049_s1 |                 | NOTCH1  | Hs01062014_m1 |
|                                                                                | NANOG         | Hs02387400_g1 |                 | TNNI3   | Hs00165957_m1 |
| LIN28                                                                          | Hs00702808_s1 | GJA1          | Hs00748445_s1   |         |               |
| MET                                                                            | BMP7          | Hs00233476_m1 | migration       | NKX2-5  | Hs00231763_m1 |
|                                                                                | CDH1          | Hs00170423_m1 |                 | CTNNB1  | Hs00355049_m1 |
|                                                                                | OCLN          | Hs00170162_m1 |                 | MMP3    | Hs00968308_m1 |
| iCM                                                                            | EPCAM         | Hs00158980_m1 | epigenetic      | WNT3A   | Hs00263977_m1 |
|                                                                                | TBX5          | Hs01052563_m1 |                 | HDAC2   | Hs00231032_m1 |
|                                                                                | GATA4         | Hs00171403_m1 |                 | DNMT1   | Hs00945899_m1 |
|                                                                                | MEF2C         | Hs00231149_m1 |                 | AICDA   | Hs00221068_m1 |
| housekeeping                                                                   | THY1          | Hs00264235_s1 |                 |         |               |
|                                                                                | GAPDH         | Hs99999905_m1 |                 |         |               |
|                                                                                | EEF1A1        | Hs00742749_s1 |                 |         |               |
|                                                                                | RPLP0         | Hs99999902_m1 |                 |         |               |
